# Supplementary material
Source: PubMed Central journal article supplement (PMC7328283)
Supplement: NIHMS1594974-supplement-1.pdf [file NIHMS1594974-supplement-1.pdf]

## in multiple species

### – Supplementary Material –

Tina Binderup<sup>1,2, #</sup>, Raphaël Duivenvoorden<sup>1,3, #</sup>, Francois Fay<sup>1,4, #</sup>, Mandy M.T. van Leent<sup>1</sup>, Joost Malkus<sup>1</sup>, Samantha Baxter<sup>1</sup>, Seigo Ishino<sup>1</sup>, Yiming Zhao<sup>1</sup>, Brenda Sanchez-Gaytan<sup>1</sup>, Jun Tang<sup>1,5</sup>, Giuseppe Carlucci<sup>5,6</sup>, Serge Lyashchenko<sup>5,7</sup>, Claudia Calcagno<sup>1</sup>, Nicolas Karakatsanis<sup>1</sup>, Georgios Soultanidis<sup>1</sup>, Max L. Senders<sup>1,8</sup>, Philip M. Robson<sup>1</sup>, Venkatesh Mani<sup>1</sup>, Sarayu Ramachandran<sup>1</sup>, Mark E. Lobatto<sup>1,9</sup>, Barbara A. Hutten<sup>10</sup>, Juan F. Granada<sup>11</sup>, Thomas Reiner<sup>5,7</sup>, Filip Swirski<sup>12</sup>, Matthias Nahrendorf<sup>12</sup>, Andreas Kjaer<sup>2</sup>, Edward A. Fisher<sup>13</sup>, Zahi A. Fayad<sup>1,\*</sup>, Carlos Pérez-Medina<sup>1,14</sup>, Willem J.M. Mulder<sup>1,8,15,\*</sup>

<sup>1</sup> Translational and Molecular Imaging Institute, Icahn School of Medicine at Mount Sinai, New York, NY, USA

<sup>2</sup> Department of Clinical Physiology, Nuclear Medicine and & PET, and Cluster for Molecular Imaging, Department of Biomedical Sciences, Rigshospitalet and University of Copenhagen, Copenhagen, Denmark

<sup>3</sup> Department of Nephrology, Radboud Institute for Molecular Life Sciences, Radboud University Medical Center, Nijmegen, The Netherlands

<sup>4</sup> Institut Galien Paris Sud, Faculté de Pharmacie, CNRS, Univ. Paris-Sud, Université Paris-Saclay, Châtenay-Malabry, France

<sup>5</sup> Department of Radiology, Memorial Sloan Kettering Cancer Center, New York, NY, USA

<sup>6</sup> Bernard and Irene Schwarz Center for Biomedical Imaging, New York University, New York, NY, USA

<sup>7</sup> Department of Radiology, Weill Cornell Medical College, New York, NY, USA

<sup>8</sup> Amsterdam University Medical Centers, Dept. of Medical Biochemistry, University of Amsterdam, Amsterdam, The Netherlands

<sup>9</sup> Department of Radiology, Spaarne Gasthuis, Haarlem, The Netherlands

<sup>10</sup> Department of Clinical Epidemiology, Biostatistics and Bioinformatics, Amsterdam University Medical Centers, Amsterdam, the Netherlands

<sup>11</sup> CRF Skirball Center for Innovation, The Cardiovascular Research Foundation, Orangeburg, NY, USA

<sup>12</sup> Center for Systems Biology and Department of Radiology, Massachusetts General Hospital, Harvard Medical School, Boston, MA, USA

<sup>13</sup> Department of Medicine (Cardiology) and Cell Biology, Marc and Ruti Bell Program in Vascular Biology, New York University School of Medicine, New York, NY, USA

<sup>14</sup> Centro Nacional de Investigaciones Cardiovasculares Carlos III, Madrid, Spain

<sup>15</sup> Laboratory of Chemical Biology, Department of Biomedical Engineering and Institute for Complex Molecular Systems, Eindhoven University of Technology, Eindhoven, The Netherlands

# Equal contribution

\* Address correspondence to:

Willem J.M. Mulder, [willem.mulder@mssm.edu](mailto:willem.mulder@mssm.edu)

Zahi A. Fayad, [zahi.fayad@mssm.edu](mailto:zahi.fayad@mssm.edu)

Translational and Molecular Imaging Institute, Icahn School of Medicine at Mount Sinai

One Gustave L. Levy Place, Box 1234  
New York, NY 10029, USA

| Batch # | Composition (g) |             |        |       | Recovery* (%) | Size |           |
|---------|-----------------|-------------|--------|-------|---------------|------|-----------|
|         | APOA1           | Simvastatin | DMPC   | MHPC  |               | d.nm | $\bar{D}$ |
| 1       | 0.704           | 1.235       | 6.683  | 0.690 | 57.8          | 21.8 | 0.255     |
| 2       | 0.692           | 1.214       | 6.569  | 0.678 | 70.8          | 30.8 | 0.294     |
| 3       | 0.704           | 1.235       | 6.683  | 0.690 | 65.8          | 21.1 | 0.261     |
| 4       | 1.500           | 2.631       | 14.239 | 1.469 | 75.5          | 24.5 | 0.224     |
| 5       | 1.250           | 2.192       | 11.866 | 1.225 | 61.8          | 22.3 | 0.239     |
| 6       | 0.441           | 0.773       | 4.186  | 0.432 | 60.8          | 20.4 | 0.241     |
| 7       | 0.900           | 1.578       | 8.543  | 0.882 | 71.3          | 28.0 | 0.215     |
| 8       | 0.700           | 1.228       | 6.645  | 0.686 | 71.8          | 22.0 | 0.156     |

**Table S1.** Composition and size of different S-HDL batches prepared for this study.

\*Based on simvastatin

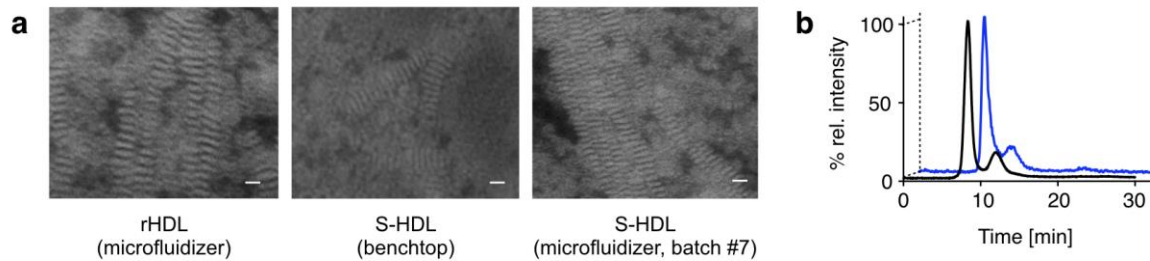

**Fig. S1. a.** Representative transmission electron microscopy (TEM) images of reconstituted high-density lipoprotein (rHDL, left), benchtop-produced simvastatin-HDL (S-HDL, middle) and microfluidizer-produced S-HDL (right). Scale bar = 10 nm. **b.** HPLC size exclusion chromatograms demonstrating co-elution of [<sup>89</sup>Zr]-S-HDL (blue trace, radioactivity signal) and unlabeled S-HDL (black trace, UV absorption at 220 nm).

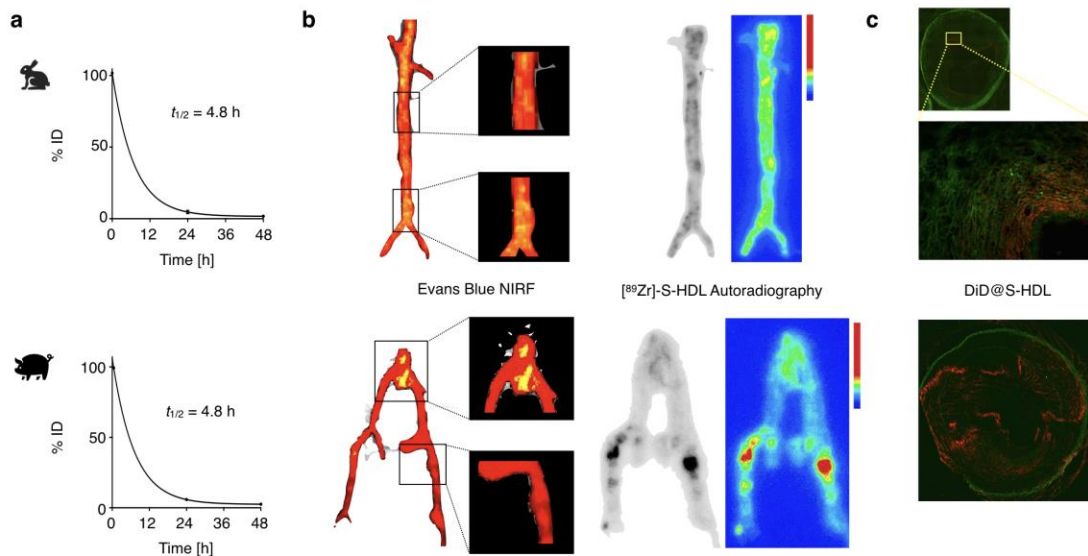

**Fig. S2. a.** Blood time–activity curve for  $[^{89}\text{Zr}]\text{-S-HDL}$  in rabbits (top, n=2) and pigs (bottom, n=2) with atherosclerosis. **b.** Representative Evans Blue near-infrared fluorescence imaging (left) and  $[^{89}\text{Zr}]\text{-S-HDL}$  autoradiography (right) performed on arterial samples from one rabbit (abdominal aorta, top) and one pig (femoral artery tree, bottom). **c.** Representative fluorescence microscopy images of arterial sections from one rabbit (top) and one pig (bottom) injected with DiD-S-HDL.

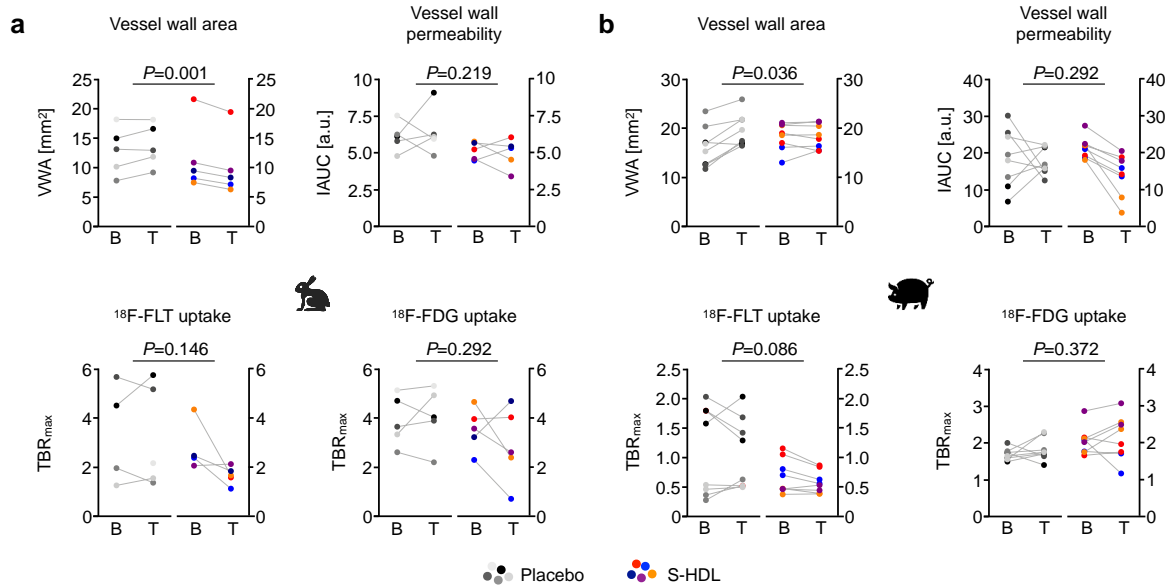

**Fig. S3. a.** Variation in the monitored parameters in rabbits treated with PBS (Placebo, red dots) or S-HDL (blue dots) between baseline (B) and terminal (T) scans. **b.** Variation in the monitored parameters in pigs treated with PBS (Placebo) or S-HDL between baseline (B) and terminal (T) scans. Dots are color-coded for individual animals. Two data points are represented per pig, corresponding to each of the femoral arteries. *P* values were calculated using the linear mixed model described in the manuscript. VWA = vessel wall area; IAUC = intensity area under the curve; TBR = target-to-background ratio.

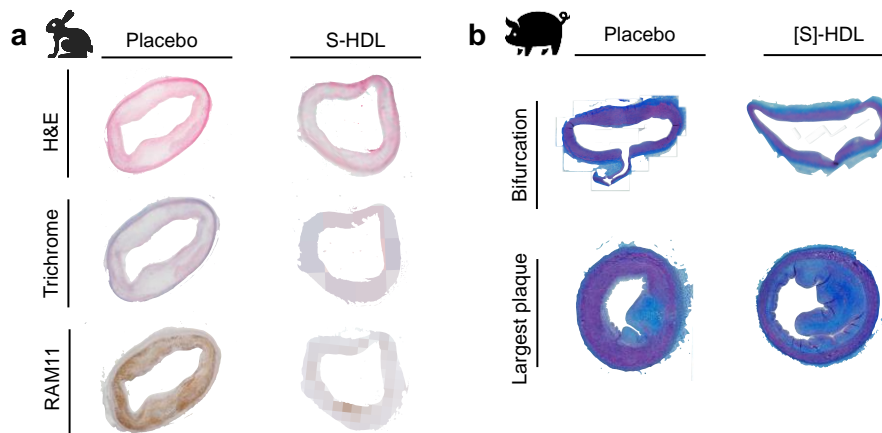

**Fig. S4. a.** Rabbit aortic sections stained with hematoxylin & eosin (H&E, top), Masson trichrome (middle) and RAM11 (macrophages, bottom) from animals treated with PBS (Placebo) or S-HDL. **b.** Porcine femoral artery sections (right) stained with Masson trichrome from animals

treated with PBS (Placebo) or S-HDL. Sections were taken from the iliac bifurcation (top) and largest plaque in the femoral artery (bottom) of the same pig.

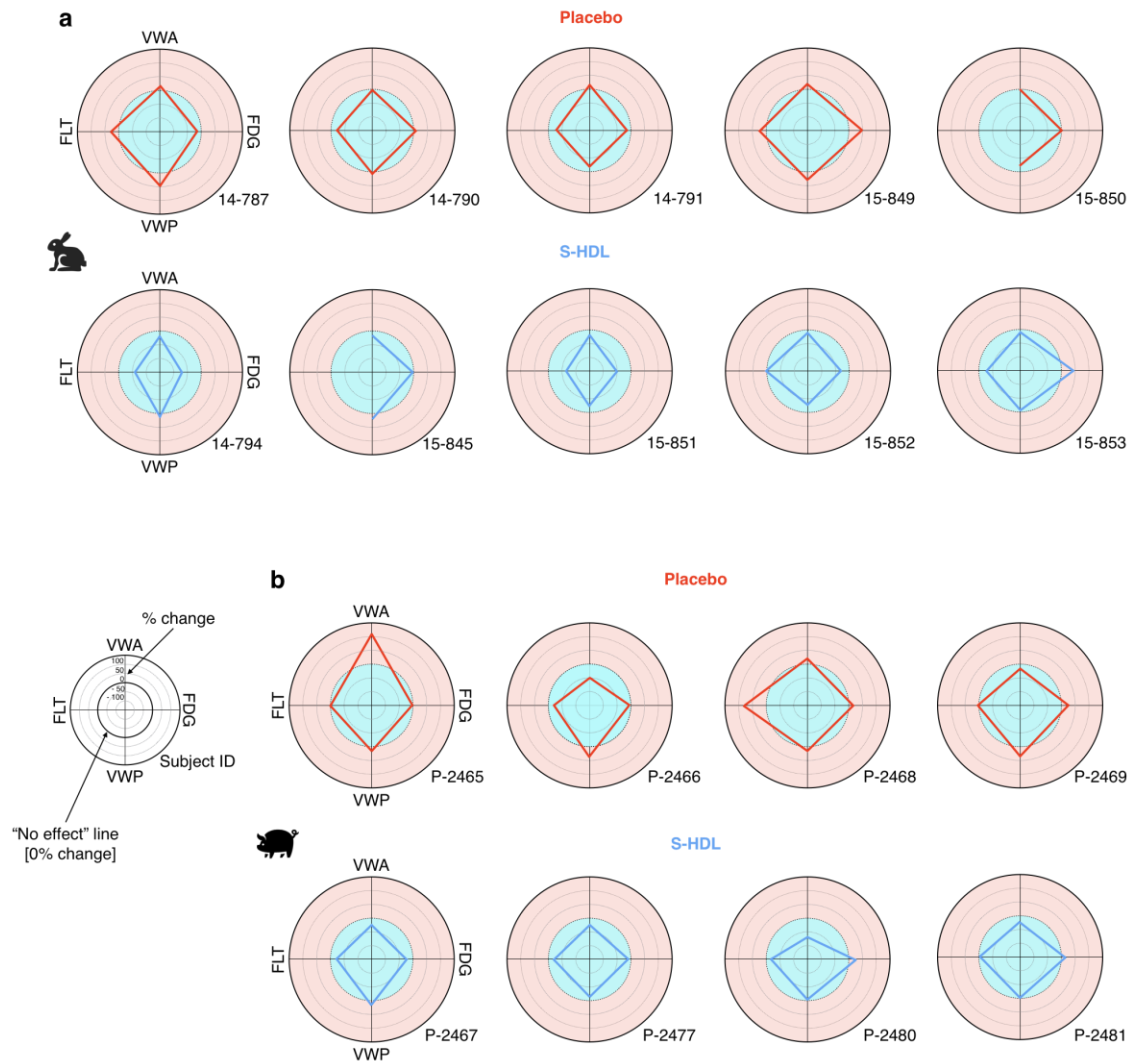

**Fig. S5. a.** Combined representation of the variation in the monitored parameters in individual rabbits treated with PBS (Placebo, top) or S-HDL (bottom), expressed as % change between baseline and terminal scans. **b.** Combined representation of the variation in the monitored parameters in individual pigs treated with PBS (Placebo, top) or S-HDL (bottom), expressed as % change between baseline and terminal scans. For FDG and FLT, data represent variation in  $TBR_{max}$ ; VWA = vessel wall area; VWP = vessel wall permeability.
